# Supplementary material for: Photoresponsive behaviour of zwitterionic polymer particles with photodimerizable groups on their surfaces
Source: Royal Society of Chemistry journal article supplement (doi:10.1039/d1tb02342j), 2022-01-01
Supplement: d1tb02342j1.pdf [file d1tb02342j1.pdf]

## Supporting Information

# Photoresponsive behaviour of zwitterionic polymer particles with photodimerizable groups on their surfaces

*Takashi Miyata,<sup>\*a,b</sup> Takayuki Namera,<sup>a</sup> Yihua Liu,<sup>c</sup> Akifumi Kawamura,<sup>a,b</sup> and*

*Tetsuji Yamaoka<sup>c</sup>*

<sup>a</sup> Department of Chemistry and Materials Engineering, Kansai University, 3-3-35, Yamate-cho, Suita, Osaka 564-8680, Japan.

<sup>b</sup> Organization for Research and Development of Innovative Science and Technology, Kansai University, 3-3-35, Yamate-cho, Suita, Osaka 564-8680, Japan

<sup>c</sup> Department of Biomedical Engineering, National Cerebral and Cardiovascular Center Research Institute, 6-1 Kishibe Shim-machi, Suita, Osaka 564-8565, Japan

\*Corresponding author: [tmiyata@kansai-u.ac.jp](mailto:tmiyata@kansai-u.ac.jp)

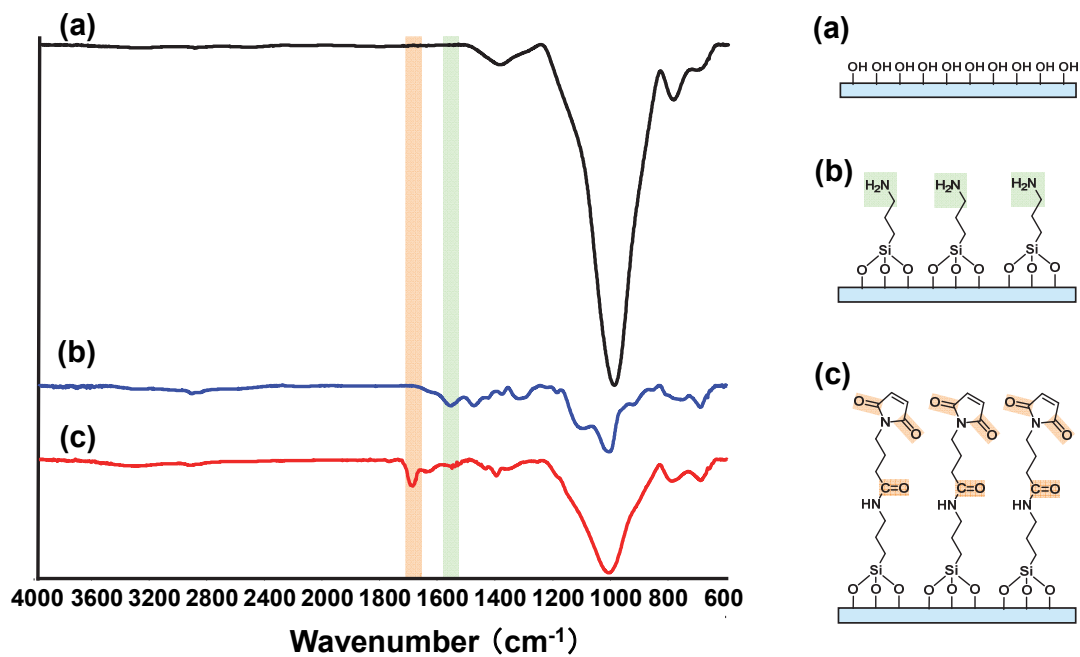

Fig. S1. ATR-FT-IR spectra of (a) unmodified, (b) amino-groups-modified and (c) maleimide-modified glass substrates.

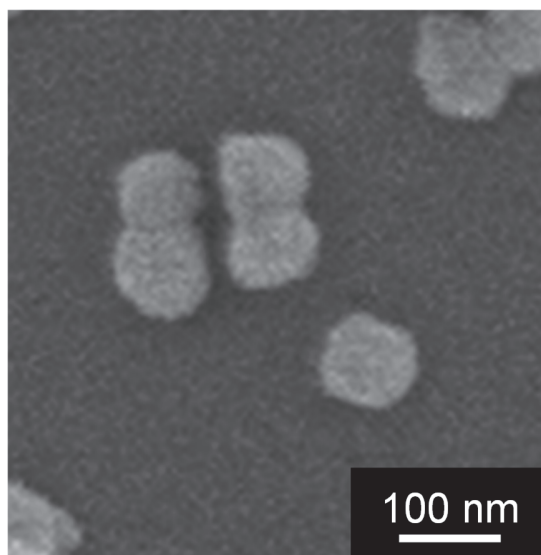

Fig. S2. SEM image of P(St-co-MAA-co-MPC) particles.

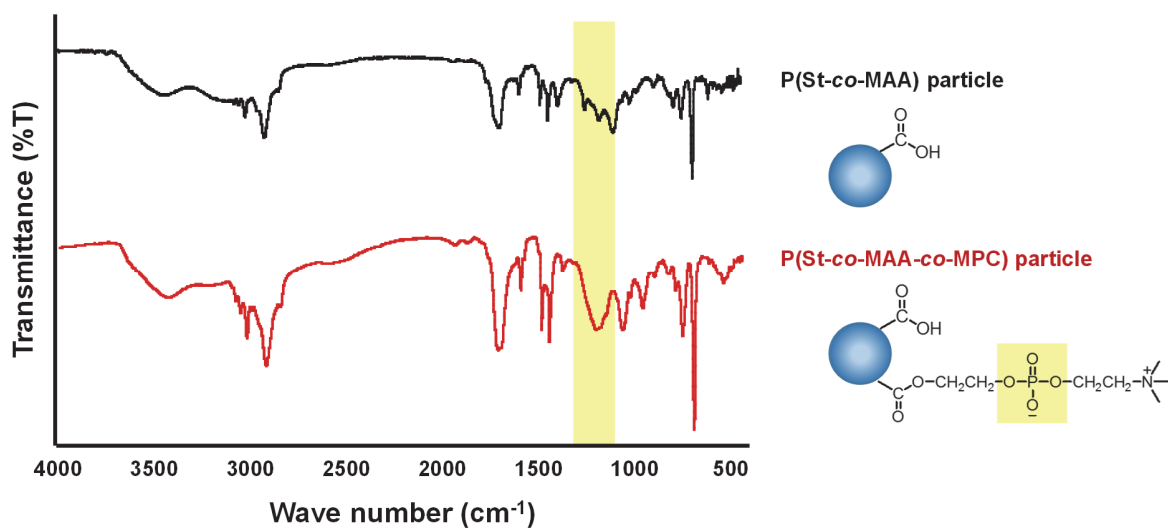

Fig. S3. FT-IR spectra of P(St-co-MAA) and P(St-co-MAA-co-MPC) particles with a MPC content of 10 mol%.

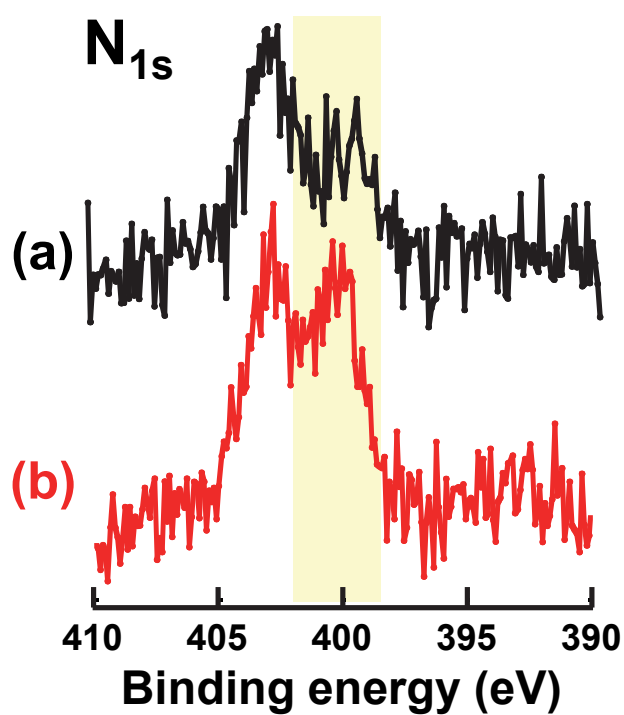

Fig. S4. XPS spectra of  $\text{N}_{1s}$  region of (a) maleimide-P(St-co-MAA-co-MPC) and (b) P(St-co-MAA-co-MPC) particles with a MPC content of 15 mol%.

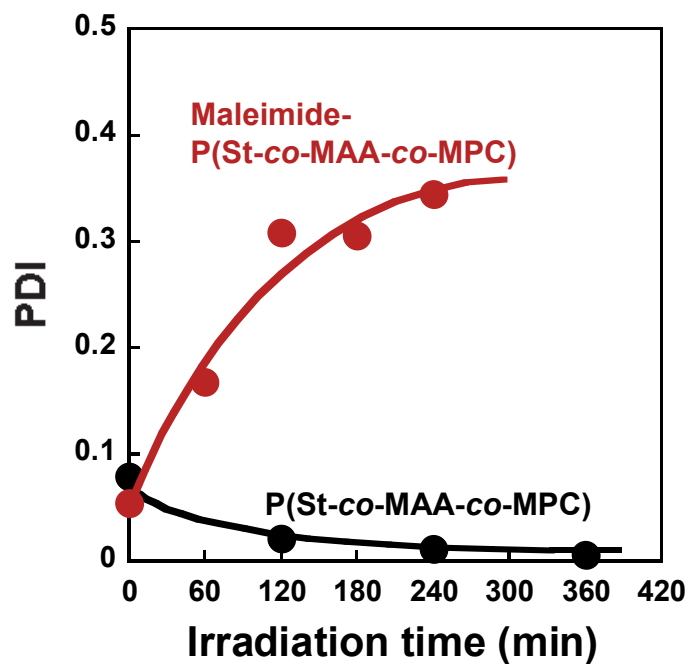

Fig. S5. Effect of UV irradiation time on PDI of P(St-co-MAA-co-MPC) and maleimide-P(St-co-MAA-co-MPC) particles in water with 150 mM NaCl.

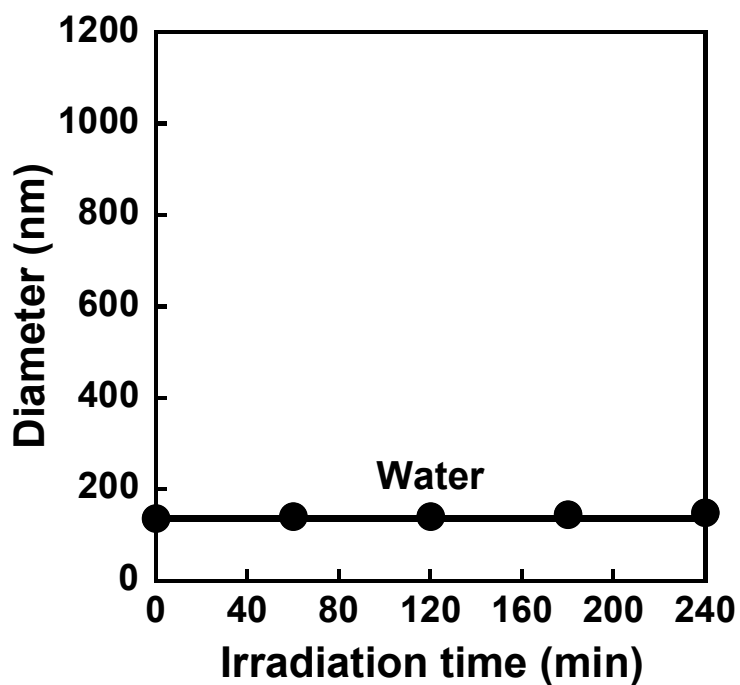

Fig. S6. Relationship between UV irradiation time and diameter of maleimide-P(St-co-MAA-co-MPC) particles in water without NaCl.

Table S1. Atomic ratio of the surface of P(St-co-MAA) particles and P(St-co-MAA-co-MPC) particles with a MPC content of 10 mol%.

| Atomic ratio (%) | P(St-co-MAA) | P(St-co-MAA-co-MPC) |
|------------------|--------------|---------------------|
| C <sub>1s</sub>  | 62.1         | 65.9                |
| O <sub>1s</sub>  | 37.3         | 32.6                |
| N <sub>1s</sub>  | 0.6          | 0.8                 |
| P <sub>2p</sub>  | 0.0          | 0.7                 |
